# Supplementary material
Source: publisher site journal article supplement (https://www.dovepress.com/article/227482)
Supplement: Supplementary file 1 [file get_supplementary_file.php]

TableS 1. Predicted related genes of LINC00265.

| Gene name | | | | | | |
| --- | --- | --- | --- | --- | --- | --- |
| ZNF445 | RABEP2 | CDK13 | TAS2R4 | BEND7 | MZF1 | SMG1 |
| ASB16 | CCDC7 | RPS9 | PIP4K2B | PDZD3 | FAM71F2 | TAS2R5 |
| RNF32 | RNF207 | ANKS4B | USH1C | DAB1 | HPX | ARHGEF12 |
| FBXL18 | LIMD1 | NR6A1 | SRC | DNAH6 | EGFR | SLC22A23 |
| ZC3H13 | DIS3 | MUC12 | ZNF707 | TTLL3 | CCDC57 | NRP1 |
| CHD2 | ACACB | ARL5A | PLXNB1 | TNRC18 | VIL1 | RFFL |
| ZNF507 | PLCXD2 | N4BP1 | PIKFYVE | TIRAP | MYO1D | ZBTB40 |
| MEP1B | CYP2C9 | PURB | PRCP | SFXN5 | ZNF75D | RAD52 |
| MCF2L | ZNF219 | PCNXL2 | FOXN3 | TUBGCP6 | MLLT10 | PHLPP2 |
| RALGPS1 | TACC2 | GPR113 | RAD54L2 | PACS2 | TLN2 | YEATS2 |
| CHERP | DNAJC16 | DSCR8 | CDK5RAP2 | ITSN2 | SYNRG | CNDP1 |
| KIAA2018 | RGR | ATP10B | ZNF3 | ARVCF | CBL | TGFB3 |
| ADCY6 | SP2 | KIAA0226 | ZNF462 | NADSYN1 | INADL | POU2F3 |
| LRRC8C | DNAH1 | BCL2L14 | ZNF160 | TRAF5 | C1QTNF9 | NF1 |
| CASP2 | TRPV1 | DDI2 | MCM3AP | SEC16B | KIAA1109 | CLK3 |
| AKAP9 | TAS2R38 | C2CD3 | TSGA10 | SPDYE1 | PSMB2 | FAM182B |
| GGNBP2 | PDXDC1 | GNAT2 | ARSK | TRIM67 | R3HDM2 | TSSK3 |
| SETD5 | TTC21A | LHX4 | ZNF7 | STAT5B | TJP2 | THRB |
| RAPGEF5 | ELMO2 | ZNF490 | ZNF248 | SRCAP | RNF39 | TTLL5 |
| NDUFA10 | ZC3H7B | SHANK2 | SNX13 | SLC23A3 | PDPK1 | ARHGAP33 |
| ZSCAN20 | SPIRE2 | PDS5B | KCNIP2 | KSR1 | FUT2 | SMCR8 |
| CCDC14 | PHF8 | NR1I2 | ZNF789 | PLA2G4F | ATG2B | CMIP |
| DBF4B | MARVELD3 | BRPF3 | CARD14 | SCAPER | TIAF1 | ZNF74 |
| ERBB3 | LRRC43 | ETV3 | GATAD1 | ZC3H12B | RAG1 | CACNA1D |
| SLC17A4 | MDN1 | SPATA13 | MKL2 | TSNARE1 | ENGASE | ZNF808 |
| HNF4A | AP1G2 | CEMP1 | SNRNP70 | DNAH10 | HOXA2 | SNX22 |
| PKLR | KCNK10 | NEB | EME2 | LMCD1 | ASMT | MTHFR |
| DQX1 | PROZ | TAS2R14 | TTLL2 | ITPR3 | TMED3 | KCNK5 |
| ARL17A | NOS1AP | KIAA0895L | RECQL5 | TGOLN2 | PAAF1 | RNF6 |
| DIP2A | KRTAP2-4 | TMEM184A | PNPLA7 | STRN | TFCP2L1 | PRAP1 |
| F7 | RPS14 | TBCA | MAP3K13 | KCTD7 | SRCIN1 | GPR75 |
| TNFRSF25 | SART3 | BLCAP | FBXO31 | MTHFSD | CHD6 | GCLC |
| MAPK15 | PLEKHA8 | ARHGEF1 | FARP2 | ARSD | OCLM | GUCY2C |
| NUDCD3 | CDH17 | PGPEP1 | KRTAP2-1 | TTLL6 | DYRK3 | LMO7 |
| PRDX2 | KCNJ6 | TRAPPC4 | KRTAP2-2 | NUDT6 | ATP5J2 | ZNF169 |
| APOL4 | ZNF81 | MRE11A | KIF12 | ZNF692 | PLCG1 |  |
| ZNF696 | PRDM16 | WWP2 | PABPC1L | TMEM151B | IKZF4 |  |
| OR51E1 | PNPLA1 | NDUFA9 | MLLT6 | MLEC | FAM122C |  |
| ZNF236 | TSSK4 | CEP250 | DEPDC4 | SNORA71A | WDR27 |  |
